# Supplementary material
Source: publisher figshare collection journal article supplement (https://karger.figshare.com/ndownloader/files/24080171)
Supplement: Supplementary file 1 [file 24080171]

Pubmed

(“Aortic Coarctation”[Mesh] OR “Aortic coarctation”[tw] OR “aortic arch anomaly”[tw] OR “Coarctation of the aorta”[tw] OR “aortic anomaly”[tw] OR “aortic anomalies”[tw] OR “Coarctation of the aorta”[tw]) AND ("Twins"[Mesh] OR "Twins"[tw] OR "Twin"[tw] OR "Twins, Monozygotic"[Mesh] OR "Twinning, Monozygotic"[Mesh] OR “Twins, Monozygotic”[tw] OR “Monozygotic twins”[tw] OR “Monozygotic-twins”[tw] OR “Monozygotic twin”[tw] OR “Monozygotic-twin”[tw] OR “Twinning, Monozygotic”[tw] OR “Monozygotic twinning”[tw] OR “Identical twins”[tw] OR “Identical-twins”[tw] OR “Identical twin”[tw] OR “Identical-twin”[tw] OR “Twins, Identical”[tw] OR “Monochorionic twins”[tw] OR “Monochorionic-twins”[tw] OR “Monochorionic twin”[tw] OR “Monochorionic-twin”[tw] OR “Monochorionic Diamniotic”[tw] OR “Monochorionic-Diamniotic”[tw] OR “Monochorionic Monoamniotic”[tw] OR “Monochorionic-Monoamniotic”[tw])

Embase

("Aortic Coarctation".ti,ab. OR "Aortic coarctation".ti,ab. OR "aortic arch anomaly".ti,ab. OR "Coarctation of the aorta".ti,ab. OR "aortic anomaly".ti,ab. OR "aortic anomalies".ti,ab. OR "Coarctation of the aorta".ti,ab.) AND

("Twins".ti,ab. OR "Twins".ti,ab. OR "Twin".ti,ab. OR "Monozygotic twins".ti,ab. OR "Monozygotic-twins".ti,ab. OR "Monozygotic twin".ti,ab. OR "Monozygotic-twin".ti,ab. OR "Monozygotic twinning".ti,ab. OR "Identical twins".ti,ab. OR "Identical-twins".ti,ab. OR "Identical twin".ti,ab. OR "Identical-twin".ti,ab. OR "Monochorionic twins".ti,ab. OR "Monochorionic-twins".ti,ab. OR "Monochorionic twin".ti,ab. OR "Monochorionic-twin".ti,ab. OR "Monochorionic Diamniotic".ti,ab. OR "Monochorionic-Diamniotic".ti,ab. OR "Monochorionic Monoamniotic".ti,ab. OR "Monochorionic-Monoamniotic".ti,ab.)

**Web of science:**

**TS=** ("Twins" OR "Twins" OR "Twin" OR "Monozygotic twins" OR "Monozygotic-twins" OR "Monozygotic twin" OR "Monozygotic-twin" OR "Monozygotic twinning" OR "Identical twins" OR "Identical-twins" OR "Identical twin" OR "Identical-twin" OR "Monochorionic twins" OR "Monochorionic-twins" OR "Monochorionic twin" OR "Monochorionic-twin" OR "Monochorionic Diamniotic" OR "Monochorionic-Diamniotic" OR "Monochorionic Monoamniotic" OR "Monochorionic-Monoamniotic")

AND

TS=("Aortic Coarctation" OR "Aortic coarctation" OR "aortic arch anomaly" OR "Coarctation of the aorta" OR "aortic anomaly" OR "aortic anomalies" OR "Coarctation of the aorta")

**Cochrane:**

(Twins OR Twins OR Twin OR Monozygotic twins OR Monozygotic-twins OR Monozygotic twin OR Monozygotic-twin OR Monozygotic twinning OR Identical twins OR Identical-twins OR Identical twin OR Identical-twin OR Monochorionic twins OR Monochorionic-twins OR Monochorionic twin OR Monochorionic-twin OR Monochorionic Diamniotic OR Monochorionic-Diamniotic OR Monochorionic Monoamniotic OR Monochorionic-Monoamniotic) AND

(Aortic Coarctation OR Aortic coarctation OR aortic arch anomaly OR Coarctation of the aorta OR aortic anomaly OR aortic anomalies OR Coarctation of the aorta)
